# Supplementary material for: Investigating the Transient Regenerative Potential of Cardiac Muscle Using a Neonatal Pig Partial Apical Resection Model
Source: MDPI journal article supplement (doi:10.3390/bioengineering9080401), 2022-08-18
Supplement: s1 [file s1]

## Supplemental Tables

**Supplemental Table S1.** Experimental layout for assessing the regenerative potential of neonatal pig hearts.

|                              |                  |                  |
|------------------------------|------------------|------------------|
| Total N=36                   |                  |                  |
| Age Group                    | 0 Day Old Piglet | 7 Day Old Piglet |
| Apex Removal Surgery         | N=13             | N=15             |
| Sham Surgery (Control)       | N=4              | N=4              |
|                              |                  |                  |
| Heart Harvest for Assessment |                  |                  |
|                              | N=4 (5 Days PO)  | N=5 (5 Days PO)  |
| Apex Removal Surgery         | N=4 (1 Week PO)  | N=5 (1 Week PO)  |
|                              | N=5 (4 Weeks PO) | N=5 (4 Weeks PO) |
| Sham Surgery                 | N=2 (1 Week PO)  | N=2 (1 Week PO)  |
|                              | N=2 (4 Weeks PO) | N=2 (4 Weeks PO) |

**Supplemental Table S2:** Surgery information for each piglet. Table summarizes sex, body weight, resected tissue mass, and age of the piglets.

| Piglet ID        | Sex of Piglet | Body Weight at Surgery (lbs) | Tissue Mass Removed from Apical Region (mg)                 | Age at Time of Apical Resection |
|------------------|---------------|------------------------------|-------------------------------------------------------------|---------------------------------|
| 2033             | M             | 3.31                         | 0 day control                                               | NA                              |
| 2038             | F             | 2.81                         | 0 day control                                               | NA                              |
| 005              | F             | 3.53                         | 0 day control                                               | NA                              |
| 017              | M             | 2.20                         | 0 day control                                               | NA                              |
| 2034             | M             | 4.31                         | *, sample lost in pig (cut similar to 2035)                 | 0 days                          |
| 2035             | F             | 3.31                         | 5.1                                                         | 0 days                          |
| 2036             | M             | 3.69                         | 22.6                                                        | 0 days                          |
| 2039             | M             | 3.79                         | 34.5 (accidently killed by the mother sow 3 days PO)        | 0 days                          |
| 2037             | F             | 3.56                         | *, sample lost in pig (cut similar to 2039)                 | 0 days                          |
| 004              | M             | 3.09                         | 2.3                                                         | 0 days                          |
| 013              | F             | 3.00                         | 2.2                                                         | 0 days                          |
| 014              | M             | 4.37                         | 16.8                                                        | 0 days                          |
| 015              | F             | 4.10                         | 3.1                                                         | 0 days                          |
| 001              | F             | 3.60                         | 2.9                                                         | 0 days                          |
| 002              | F             | 3.75                         | 2.6                                                         | 0 days                          |
| 018              | F             | 3.53                         | 0.8                                                         | 0 days                          |
| 024              | M             | 3.09                         | 0.3                                                         | 0 days                          |
| <b>AVG ± STD</b> |               | <b>3.64 ± 0.48</b>           | <b>8.47 ± 11.20</b>                                         |                                 |
|                  |               |                              |                                                             |                                 |
| 2071             | F             | 6.31                         | 7 day control                                               | NA                              |
| 2077             | M             | 3.42                         | 7 day control                                               | NA                              |
| 012              | F             | 5.51                         | 7 day control                                               | NA                              |
| 027              | M             | 6.59                         | 7 day control                                               | NA                              |
| 2073             | M             | 3.09                         | 13.0                                                        | 7 days                          |
| 2075             | M             | 4.41                         | 6.0                                                         | 7 days                          |
| 2076             | M             | 7.48                         | 8.4                                                         | 7 days                          |
| 2078*            | M             | 4.86                         | *, heart tore during surgery; euthanized-massive blood loss | 7 days                          |
| 2079*            | F             | 5.29                         | *, resected into ventricle; euthanized-massive blood loss   | 7 days                          |
| 007              | F             | 5.07                         | 6.7                                                         | 7 days                          |
| 008              | M             | 5.07                         | 5.2                                                         | 7 days                          |
| 029              | F             | 7.74                         | 12.2                                                        | 7 days                          |
| 031              | M             | 7.61                         | 2.3                                                         | 7 days                          |
| 009              | M             | 5.07                         | 9.9                                                         | 7 days                          |
| 010              | F             | 6.17                         | 7.3                                                         | 7 days                          |
| 011              | M             | 5.07                         | 2.4                                                         | 7 days                          |
| 016              | F             | 6.72                         | 11.5                                                        | 7 days                          |
| 026              | M             | 7.34                         | 6.5                                                         | 7 days                          |
| 028              | M             | 8.07                         | 9.0                                                         | 7 days                          |
| <b>AVG ± STD</b> |               | <b>6.39 ± 1.19</b>           | <b>5.62 ± 1.75</b>                                          |                                 |

**Supplemental Table S3:** Body weight, weight of the heart, and age of piglets at euthanasia.

| Piglet ID and Group   | Body Weight at Euthanasia (lbs) | Heart Mass at Euthanasia (g) | Age at Euthanasia   |
|-----------------------|---------------------------------|------------------------------|---------------------|
| 2033 (0 day control)  | 13.28                           | 35.73                        | 4 weeks             |
| 2038 (0 day control)  | 13.88                           | 56.70                        | 4 weeks             |
| <b>AVG ± STD</b>      | <b>13.58 ± 0.30</b>             | <b>46.22 ± 10.49</b>         | -----               |
| 2034 (0 day surgery)  | 14.52                           | 42.52                        | 4 weeks             |
| 2035 (0 day surgery)  | 15.40                           | 39.69                        | 4 weeks             |
| 2036 (0 day surgery)  | 15.66                           | 42.52                        | 4 weeks             |
| 2037 (0 day surgery)  | 16.24                           | 48.19                        | 4 weeks             |
| <b>AVG ± STD</b>      | <b>15.46 ± 0.62</b>             | <b>43.23 ± 3.09</b>          | -----               |
| 2039* (0 day surgery) | -----                           | -----                        | Lost at 3 days      |
|                       |                                 |                              |                     |
| 2071 (7 day control)  | 16.78                           | 51.03                        | 5 weeks             |
| 2077 (7 day control)  | 16.82                           | 48.19                        | 5 weeks             |
| <b>AVG ± STD</b>      | <b>16.80 ± 0.02</b>             | <b>49.61 ± 1.42</b>          | -----               |
| 2073 (7 day surgery)  | 9.48                            | 25.51                        | 5 weeks             |
| 2075 (7 day surgery)  | 11.16                           | 31.18                        | 5 weeks             |
| 2076 (7 day surgery)  | 21.52                           | 56.70                        | 5 weeks             |
| <b>AVG ± STD</b>      | <b>14.05 ± 5.32</b>             | <b>37.80 ± 13.57</b>         | -----               |
| 2078* (7 day surgery) | -----                           | -----                        | Lost during surgery |
| 2079* (7 day surgery) | -----                           | -----                        | Lost during surgery |
|                       |                                 |                              |                     |
| 005 (0 day control)   | 5.82                            | 26.48                        | 1 week              |
| 017 (0 day control)   | 4.08                            | 18.92                        | 1 week              |
| <b>AVG ± STD</b>      | <b>4.95 ± 0.87</b>              | <b>22.70 ± 3.78</b>          | -----               |
| 004 (0 day surgery)   | 4.02                            | 14.83                        | 5 days              |
| 013 (0 day surgery)   | 4.23                            | 17.67                        | 5 days              |
| 014 (0 day surgery)   | 6.48                            | 26.73                        | 5 days              |
| 015 (0 day surgery)   | 5.86                            | 28.00                        | 5 days              |
| <b>AVG ± STD</b>      | <b>5.15 ± 1.05</b>              | <b>21.81 ± 5.67</b>          | -----               |
| 001 (0 day surgery)   | 5.46                            | 20.01                        | 1 week              |
| 002 (0 day surgery)   | 5.30                            | 22.82                        | 1 week              |
| 018 (0 day surgery)   | 5.86                            | 34.91                        | 1 week              |
| 024 (0 day surgery)   | 5.20                            | 28.57                        | 1 week              |
| <b>AVG ± STD</b>      | <b>5.46 ± 0.25</b>              | <b>26.57 ± 5.72</b>          | -----               |
|                       |                                 |                              |                     |
| 012 (7 day control)   | 10.10                           | 31.16                        | 1 week              |
| 027 (7 day control)   | 9.88                            | 31.52                        | 1 week              |
| <b>AVG ± STD</b>      | <b>9.99 ± 0.11</b>              | <b>31.34 ± 0.18</b>          | -----               |
| 007 (7 day surgery)   | 7.64                            | 24.71                        | 5 days              |
| 008 (7 day surgery)   | 6.92                            | 22.22                        | 5 days              |
| 011 (7 day surgery)   | 9.06                            | 39.72                        | 5 days              |
| 029 (7 day surgery)   | 7.74                            | 34.27                        | 5 days              |
| 031 (7 day surgery)   | 7.61                            | 34.14                        | 5 days              |
| <b>AVG ± STD</b>      | <b>7.79 ± 0.70</b>              | <b>31.01 ± 6.53</b>          | -----               |
| 009 (7 day surgery)   | 8.30                            | 34.54                        | 1 week              |
| 010 (7 day surgery)   | 10.34                           | 34.36                        | 1 week              |
| 016 (7 day surgery)   | 6.72                            | 37.80                        | 1 week              |
| 026 (7 day surgery)   | 7.34                            | 42.16                        | 1 week              |
| 028 (7 day surgery)   | 8.07                            | 44.11                        | 1 week              |
| <b>AVG ± STD</b>      | <b>8.15 ± 1.23</b>              | <b>38.59 ± 3.95</b>          | -----               |
